# Supplementary material for: Frontal noradrenergic and cholinergic transients exhibit distinct spatiotemporal dynamics during competitive decision-making
Source: PubMed Central journal article supplement — bioRxiv. 2024 Jan 24:2024.01.23.576893. Preprint. [Version 1] doi: 10.1101/2024.01.23.576893 (PMC10849696; doi:10.1101/2024.01.23.576893), 2024-01-24
Supplement: NIHPP2024.01.23.576893v1-supplement-1.pdf [file NIHPP2024.01.23.576893v1-supplement-1.pdf]

1160 **Supplementary Material**

1161 **Supplementary Table 4-1. Statistical results for the level of information integration in**

1162 **GRAB<sub>NE2h</sub> and GRAB<sub>ACh3.0</sub> data**

|                                              | <b>NE<br/>(Number of<br/>ROIs, %)</b> | <b>p-value<br/>(Chi-square<br/>test)</b> | <b>ACh<br/>(Number of<br/>ROIs, %)</b> | <b>p-value<br/>(Chi-square<br/>test)</b> |
|----------------------------------------------|---------------------------------------|------------------------------------------|----------------------------------------|------------------------------------------|
| <b>Choice-outcome<br/>(Chance level)</b>     | 2,917, 10.0%<br>(9.0%)                | 0                                        | 8,357, 22.7%<br>(16.3%)                | 0                                        |
| <b>Outcome-reinforcer<br/>(Chance level)</b> | 2,819, 9.5%<br>(8.4%)                 | 0                                        | 3,316, 9.0%<br>(6.0%)                  | 0                                        |
| <b>Choice-reinforcer<br/>(Chance level)</b>  | 2,153, 7.3%<br>(3.5%)                 | 0                                        | 2,252, 6.1%<br>(2.7%)                  | 0                                        |

1163

1164 **Supplementary Table 4-2. Statistical results for the conditional probabilities  $P(v_1|v_2)$**

|                           |                  | <b>NE<br/>median (25, 75<br/>percentile) (%)</b> | <b>ACh<br/>median (25, 75<br/>percentile) (%)</b> | <b>p-value<br/>(median test)</b> |
|---------------------------|------------------|--------------------------------------------------|---------------------------------------------------|----------------------------------|
| <b>Choice-outcome</b>     | $P(r_n c_n)$ (%) | 62.3<br>(28.1, 95.6)                             | 91.2<br>(82.4, 94.0)                              | 0.044                            |
|                           | $P(c_n r_n)$ (%) | 48.8<br>(29.3, 71.0)                             | 51.9<br>(31.4, 91.5)                              | 0.864                            |
| <b>Outcome-reinforcer</b> | $P(r_n x_n)$ (%) | 54.1<br>(22.3, 95.9)                             | 95.6<br>(84.3, 97.2)                              | 0.034                            |
|                           | $P(x_n r_n)$ (%) | 53.0<br>(32.2, 60.5)                             | 30.3<br>(26.7, 36.6)                              | 0.072                            |
| <b>Choice-reinforcer</b>  | $P(c_n x_n)$ (%) | 50.9<br>(31.6, 72.3)                             | 94.4<br>(68.3, 98.9)                              | 0.030                            |
|                           | $P(x_n c_n)$ (%) | 73.2<br>(30.2, 88.8)                             | 35.7<br>(28.3, 41.8)                              | 0.002                            |

1165

1166

1167 **Supplementary Table 5-1. Statistical results for the temporal parameters of different**  
 1168 **groups**

|                |            |                                         | <b>NE<br/>median (25,<br/>75 percentile)</b> | <b>ACh<br/>median (25,<br/>75 percentile)</b> | <b>p-value<br/>(rank sum<br/>test)</b> |
|----------------|------------|-----------------------------------------|----------------------------------------------|-----------------------------------------------|----------------------------------------|
| <b>Outcome</b> | Group<br>1 | Median time-to-peak (s)                 | 0.80<br>(0.75, 0.85)                         | 1.95<br>(1.35, 2.45)                          | $1.54 \times 10^{-13}$                 |
|                |            | Variance time-to-peak (s <sup>2</sup> ) | 0.21<br>(0.08, 1.04)                         | 0.82<br>(0.28, 1.37)                          | 0.002                                  |
|                |            | Median peak-value (a.u.)                | 0.07<br>(0.05, 0.09)                         | 0.05<br>(0.04, 0.06)                          | 0.003                                  |
|                | Group<br>2 | Median time-to-peak (s)                 | 0.75<br>(0.75, 0.85)                         | 0.95<br>(0.85, 1.15)                          | $1.43 \times 10^{-4}$                  |
|                |            | Variance time-to-peak (s <sup>2</sup> ) | 0.12<br>(0.01, 0.60)                         | 0.37<br>(0.12, 0.58)                          | 0.108                                  |
|                |            | Median peak-value (a.u.)                | -0.04<br>(-0.06, 0.03)                       | -0.03<br>(-0.04, -0.02)                       | 0.002                                  |
| <b>Choice</b>  | Group<br>1 | Median time-to-peak (s)                 | 0.55<br>(0.35, 0.80)                         | 1.85<br>(1.25, 2.95)                          | $1.06 \times 10^{-7}$                  |
|                |            | Variance time-to-peak (s <sup>2</sup> ) | 0.62<br>(0.02, 1.46)                         | 1.50<br>(0.33, 3.15)                          | 0.003                                  |
|                |            | Median peak-value (a.u.)                | -0.04<br>(-0.07, -0.02)                      | 0.03<br>(0.01, 0.04)                          | $3.53 \times 10^{-14}$                 |
|                | Group<br>2 | Median time-to-peak (s)                 | 0.55<br>(0.38, 0.65)                         | 1.55<br>(0.80, 2.08)                          | 0.022                                  |
|                |            | Variance time-to-peak (s <sup>2</sup> ) | 0.01<br>(0.00, 0.15)                         | 0.58<br>(0.21, 1.32)                          | 0.001                                  |
|                |            | Median time-to-peak (a.u.)              | 0.02<br>(0.00, 0.05)                         | -0.03<br>(-0.04, -0.02)                       | $1.88 \times 10^{-7}$                  |

1169

1170

1171

1172 **Supplementary Table 6-1. Statistical results for the effect of region and power on**  
 1173 **probability to switch, related to Fig. 6F**

1174 **Dbh-cre;Ai32**

| Source       | Sum Sq.    | df | Singular? | Mean Sq.   | F          | Prob>F     |
|--------------|------------|----|-----------|------------|------------|------------|
| power        | 0.03526439 | 2  | 0         | 0.01763219 | 7.56886624 | 0.00101344 |
| region       | 0.00098233 | 4  | 0         | 0.00024558 | 0.10541969 | 0.98028781 |
| power*region | 0.00088444 | 8  | 0         | 0.00011055 | 0.04745728 | 0.99994653 |
| Error        | 0.17471764 | 75 | 0         | 0.00232957 |            |            |
| Total        | 0.2118488  | 89 | 0         |            |            |            |

1175 Post-Hoc

| Group A     | Group B     | Lower Limit | A-B        | Upper Limit | P-value    |
|-------------|-------------|-------------|------------|-------------|------------|
| power=3mW   | power=1.5mw | -0.0095731  | 0.02022529 | 0.05002365  | 0.24236299 |
| power=3mw   | power=0mW   | 0.01847739  | 0.04827575 | 0.07807411  | 0.00065928 |
| power=1.5mW | power=0mW   | -0.0017479  | 0.02805046 | 0.05784882  | 0.06931062 |

1176

1177 **ChAt-cre;Ai32**

| Source       | Sum Sq.    | df  | Singular? | Mean Sq.   | F          | Prob>F     |
|--------------|------------|-----|-----------|------------|------------|------------|
| power        | 0.02519462 | 2   | 0         | 0.01259731 | 8.38794621 | 0.00045669 |
| region       | 0.00200658 | 4   | 0         | 0.00050165 | 0.33402191 | 0.85439824 |
| power*region | 0.00156262 | 8   | 0         | 0.00019533 | 0.13005928 | 0.99777634 |
| Error        | 0.13516513 | 90  | 0         | 0.00150183 |            |            |
| Total        | 0.16392895 | 104 | 0         |            |            |            |

1178 Post-Hoc

| Group A     | Group B     | Lower Limit | A-B        | Upper Limit | P-value    |
|-------------|-------------|-------------|------------|-------------|------------|
| power=3mW   | power=1.5mW | 0.01586284  | 0.03793956 | 0.06001628  | 0.00026894 |
| power=3mW   | power=0mW   | -0.0026469  | 0.01942986 | 0.04150658  | 0.0960785  |
| power=1.5mw | power=0mW   | -0.0405864  | -0.0185097 | 0.00356702  | 0.11854034 |

1179

1180

1181 **Supplementary Table 6-2. Statistical results for the effect of power on overall session,**  
1182 **related to Fig. 6G**

1183

1184 **Dbh-Cre;Ai32**

1185 Entropy

| Source | SS         | df | MS         | F          | Prob>F     |
|--------|------------|----|------------|------------|------------|
| Power  | 0.06082996 | 2  | 0.03041498 | 0.89538033 | 0.41628803 |
| Error  | 1.39272013 | 41 | 0.03396878 |            |            |
| Total  | 1.4535501  | 43 |            |            |            |

1186

1187 Number of Trials

| Source | SS         | df | MS         | F          | Prob>F    |
|--------|------------|----|------------|------------|-----------|
| Power  | 43199.4181 | 2  | 21599.7091 | 1.63605203 | 0.2063718 |
| Error  | 580902.795 | 44 | 13202.3362 |            |           |
| Total  | 624102.213 | 46 |            |            |           |

1188

1189 Reward Rate

| Source | SS         | df | MS         | F          | Prob>F     |
|--------|------------|----|------------|------------|------------|
| Power  | 0.01813336 | 2  | 0.00906668 | 1.08632669 | 0.34633196 |
| Error  | 0.36723201 | 44 | 0.00834618 |            |            |
| Total  | 0.38536537 | 46 |            |            |            |

1190

1191 **ChAt-Cre;Ai32**

1192 Entropy

| Source | SS         | df | MS         | F          | Prob>F     |
|--------|------------|----|------------|------------|------------|
| Power  | 0.00983532 | 2  | 0.00491766 | 0.19571646 | 0.82297372 |
| Error  | 1.08043694 | 43 | 0.02512644 |            |            |

|       |            |    |  |  |  |
|-------|------------|----|--|--|--|
| Total | 1.09027226 | 45 |  |  |  |
|-------|------------|----|--|--|--|

1193

1194 Number of Trials

| Source | SS         | df | MS         | F          | Prob>F     |
|--------|------------|----|------------|------------|------------|
| Power  | 15025.9321 | 2  | 7512.96603 | 0.48205245 | 0.62081147 |
| Error  | 670170.938 | 43 | 15585.3706 |            |            |
| Total  | 685196.87  | 45 |            |            |            |

1195

1196 Reward Rate

| Source | SS         | df | MS         | F          | Prob>F     |
|--------|------------|----|------------|------------|------------|
| Power  | 5.14E-05   | 2  | 2.57E-05   | 0.00906747 | 0.99097541 |
| Error  | 0.12192428 | 43 | 0.00283545 |            |            |
| Total  | 0.1219757  | 45 |            |            |            |

1197

1198

1199 **Supplementary Table 6-3. Statistical results for the effect of region and stimulation on**  
 1200 **probability to switch, related to Fig. 6I**

1201

1202 **Dbh-Cre;Ai32**

| Source       | Sum Sq.    | df | Singular? | Mean Sq.   | F          | Prob>F     |
|--------------|------------|----|-----------|------------|------------|------------|
| Power        | 0.00287031 | 1  | 0         | 0.00287031 | 5.61667048 | 0.02270168 |
| Region       | 0.00617679 | 3  | 0         | 0.00205893 | 4.02895583 | 0.01353153 |
| power*region | 0.000573   | 3  | 0         | 0.000191   | 0.3737537  | 0.77237318 |
| Error        | 0.02044133 | 40 | 0         | 0.00051103 |            |            |
| Total        | 0.03006143 | 47 | 0         |            |            |            |

1203

1204 Post-Hoc for region

| Group A     | Group B     | Lower Limit | A-B        | Upper Limit | P-value    |
|-------------|-------------|-------------|------------|-------------|------------|
| region=M2-L | region=M2-R | -0.0405306  | -0.0157933 | 0.00894397  | 0.33137496 |
| region=M2-L | region=V1-L | -0.0490326  | -0.0242953 | 0.00044197  | 0.05584813 |
| region=M2-L | region=V1-R | -0.0548628  | -0.0301256 | -0.0053883  | 0.01160543 |
| region=M2-R | region=V1-L | -0.0332393  | -0.008502  | 0.01623526  | 0.79367161 |
| region=M2-R | region=V1-R | -0.0390695  | -0.0143323 | 0.01040498  | 0.41647849 |
| region=V1-L | region=V1-R | -0.0305675  | -0.0058303 | 0.01890699  | 0.92119217 |

1205

1206 Post-Hoc for power

| Group A   | Group B   | Lower Limit | A-B        | Upper Limit | P-value    |
|-----------|-----------|-------------|------------|-------------|------------|
| Power=0mW | Power=3mW | -0.0304981  | -0.0168194 | -0.0031406  | 0.01723266 |

1207

1208 **ChAt-Cre;Ai32**

| Source | Sum Sq.    | df | Singular? | Mean Sq.   | F          | Prob>F     |
|--------|------------|----|-----------|------------|------------|------------|
| stim   | 4.60E-05   | 1  | 0         | 4.60E-05   | 0.06706715 | 0.79676327 |
| region | 0.00204866 | 3  | 0         | 0.00068289 | 0.99466637 | 0.40338684 |

|             |            |    |   |            |            |            |
|-------------|------------|----|---|------------|------------|------------|
| stim*region | 0.00115308 | 3  | 0 | 0.00038436 | 0.55984416 | 0.64411262 |
| Error       | 0.03295426 | 48 | 0 | 0.00068655 |            |            |
| Total       | 0.03620204 | 55 | 0 |            |            |            |

1209

1210



1211 **Supplementary Table 6-4. Statistical results for the effect of region on overall session,**  
1212 **related to Fig. 6J**

1213

1214 **Dbh-Cre;Ai32**

1215 Entropy

| Source | SS         | df | MS         | F          | Prob>F     |
|--------|------------|----|------------|------------|------------|
| Region | 0.18972055 | 3  | 0.06324018 | 2.48832741 | 0.06710368 |
| Error  | 1.85527574 | 73 | 0.02541474 |            |            |
| Total  | 2.0449963  | 76 |            |            |            |

1216

1217 Number of Trials

| Source | SS         | df | MS         | F          | Prob>F     |
|--------|------------|----|------------|------------|------------|
| Region | 29323.8377 | 3  | 9774.61255 | 0.67280948 | 0.57131416 |
| Error  | 1118660.16 | 77 | 14528.0541 |            |            |
| Total  | 1147984    | 80 |            |            |            |

1218

1219 Reward Rate

| Source | SS         | df | MS         | F          | Prob>F     |
|--------|------------|----|------------|------------|------------|
| Region | 0.04258502 | 3  | 0.01419501 | 2.64214867 | 0.05522146 |
| Error  | 0.41368431 | 77 | 0.00537252 |            |            |
| Total  | 0.45626932 | 80 |            |            |            |

1220

1221 **ChAt-Cre;Ai32**

1222 Entropy

| Source | SS         | df  | MS         | F          | Prob>F     |
|--------|------------|-----|------------|------------|------------|
| Region | 0.01488469 | 3   | 0.00496156 | 0.32650571 | 0.80619028 |
| Error  | 1.77792625 | 117 | 0.01519595 |            |            |

|       |            |     |  |  |  |
|-------|------------|-----|--|--|--|
| Total | 1.79281094 | 120 |  |  |  |
|-------|------------|-----|--|--|--|

1223

1224 Number of Trials

| Source | SS         | df  | MS         | F          | Prob>F     |
|--------|------------|-----|------------|------------|------------|
| Region | 945.888715 | 3   | 315.296238 | 0.02759786 | 0.99378347 |
| Error  | 1336685.63 | 117 | 11424.6635 |            |            |
| Total  | 1337631.52 | 120 |            |            |            |

1225

1226 Reward Rate

| Source | SS         | df  | MS         | F          | Prob>F     |
|--------|------------|-----|------------|------------|------------|
| Region | 0.00780693 | 3   | 0.00260231 | 1.23293022 | 0.30096393 |
| Error  | 0.24694836 | 117 | 0.00211067 |            |            |
| Total  | 0.25475529 | 120 |            |            |            |

1227

1228 Post-Hoc for Reward Rate

| Group A | Group B | Lower Limit | A-B        | Upper Limit | P-value    |
|---------|---------|-------------|------------|-------------|------------|
| M2-L    | M2-R    | -0.057629   | -0.0180601 | 0.0215088   | 0.64422361 |
| M2-L    | V1-L    | -0.0588981  | -0.0193292 | 0.02023972  | 0.59174233 |
| M2-L    | V1-R    | -0.030134   | 0.0079956  | 0.04612516  | 0.94957223 |
| M2-R    | V1-L    | -0.040838   | -0.0012691 | 0.03829984  | 0.99979959 |
| M2-R    | V1-R    | -0.0120738  | 0.02605572 | 0.06418528  | 0.29505019 |
| V1-L    | V1-R    | -0.0108048  | 0.0273248  | 0.06545436  | 0.25405443 |

1229
